# Supplementary material for: Reporting Guidelines for Whole-Body Vibration Studies in Humans, Animals and Cell Cultures: A Consensus Statement from an International Group of Experts
Source: MDPI journal article supplement (doi:10.3390/biology10100965), 2021-09-27
Supplement: s1 [file s1]

# Supplement 1: Outcomes Delphi study for animal and cell cultures research

**Table S1.** Background characteristics respondents (n=4).

| Characteristic                                            | Percentage | M±SD        |
|-----------------------------------------------------------|------------|-------------|
| <b>Country located (%)</b>                                |            |             |
| United states of America                                  | 50         |             |
| Canada                                                    | 50         |             |
| <b>Academic background (%)</b>                            |            |             |
| Biomedical Engineering                                    | 25         |             |
| Physiology                                                | 50         |             |
| Biophysical                                               | 25         |             |
| <b>Highest academic degree (%)</b>                        |            |             |
| Professor                                                 | 100        |             |
| <b>Experience with WBV in animals (%)</b>                 | 100        |             |
| <b>Experience with WBV in cell cultures (%)</b>           | 100        |             |
| <b>Experience with WBV research (M±SD, years)</b>         |            | 29.3 ± 3.0  |
| <b># of publications WBV animals/cell cultures (M±SD)</b> |            | 10.0 ± 10.0 |

Abbreviation: WBV = whole-body vibration.

**Table S2.** Outcomes Delphi study: information about the vibration. Is it important to report...

| Item                                                                                             | Round 1 |          |         | Round 2 |          |         |
|--------------------------------------------------------------------------------------------------|---------|----------|---------|---------|----------|---------|
|                                                                                                  | agree   | disagree | neutral | agree   | disagree | neutral |
| 1 the type of vibration (i.e., synchronous, side-alternating, other)?                            | 100     | 0        | 0       | 100     | 0        | 0       |
| 2 which frequency (Hz) is used?                                                                  | 100     | 0        | 0       | 100     | 0        | 0       |
| 3 whether the vibration is immediately full or increases slowly?                                 | 50      | 25       | 25      | 75      | 0        | 25      |
| 4 whether the frequency (Hz) is constant or variable?                                            | 100     | 0        | 0       | 100     | 0        | 0       |
| 5 which peak-to-peak displacement (PPD) / amplitude of the vibration occurs?                     | 100     | 0        | 0       | 75      | 0        | 25      |
| 6 which peak-acceleration (in multiples of g) occurs?                                            | 100     | 0        | 0       | 100     | 0        | 0       |
| 7 which acceleration (in RMS) occurs?                                                            | 50      | 25       | 25      | 50      | 25       | 25      |
| 8 the units of the vibration parameters?                                                         | 100     | 0        | 0       | 100     | 0        | 0       |
| 9 the definitions/explanations of the vibration parameters?                                      | 75      | 25       | 0       | 100     | 0        | 0       |
| 10 if manufacturer settings or settings measured by researcher were reported?                    | 100     | 0        | 0       | 100     | 0        | 0       |
| 11 how the vibration parameters are measured?                                                    | 100     | 0        | 0       | 100     | 0        | 0       |
| 12 where on the platform the vibration parameters are measured?                                  | 100     | 0        | 0       | 100     | 0        | 0       |
| 13 how reproducible the vibration parameters are?                                                | 75      | 25       | 0       | 100     | 0        | 0       |
| 14 whether the vibrations are purely sinusoidal?                                                 | 100     | 0        | 0       | 100     | 0        | 0       |
| 15 <sup>a</sup> if unidirectional vibrations are vertical or horizontal                          |         |          |         | 100     | 0        | 0       |
| 16 <sup>a</sup> if "how much vertical vs horizontal vibrations" is measured by 3D accelerometry? |         |          |         | 100     | 0        | 0       |
| 17 <sup>a</sup> if accelerometers are ATTACHED to the cell culture plate?                        |         |          |         | 100     | 0        | 0       |
| 18 <sup>a</sup> the duration of vibration, number of bouts and intervals between bouts?          |         |          |         | 100     | 0        | 0       |

<sup>a</sup>Added on round 2 based on the suggestions of the respondents in round 1.

**Table S3.** Outcomes Delphi study: information about the device. Is it important to report...

| Item                                                                                                                                                              | Round 1 |          |         | Round 2 |          |         |
|-------------------------------------------------------------------------------------------------------------------------------------------------------------------|---------|----------|---------|---------|----------|---------|
|                                                                                                                                                                   | agree   | disagree | neutral | agree   | disagree | neutral |
| 1 the manufacturer, device specifications, and production type?                                                                                                   | 75      | 25       | 0       | 100     | 0        | 0       |
| 2 the size of the vibration platform?                                                                                                                             | 25      | 50       | 25      | 75      | 25       | 0       |
| 3 whether changes are made to the device (e.g., mounting a cage on it)?                                                                                           | 100     | 0        | 0       | 100     | 0        | 0       |
| 4 the dimensions of the cage or container in which the animal(s) was (were) placed (if any) during WBV?                                                           | 75      | 0        | 25      | 75      | 0        | 25      |
| 5 how the energy is generated (e.g., direct mechanical transmission or electromagnetic transmission) as this can have an effect on the performance of the device? | 50      | 25       | 25      | 50      | 0        | 50      |
| 6 <sup>a</sup> if animals were on all 4 paws or were able to (or did) rear up during vibration exposure?                                                          |         |          |         | 100     | 0        | 0       |
| 7 <sup>a</sup> how closely the sham conditions mimic those encountered by the animals treated with vibration?                                                     |         |          |         | 100     | 0        | 0       |

<sup>a</sup>Added on round 2 based on the suggestions of the respondents in round 1.

**Table S4.** Outcomes Delphi study: information about the administration. Is it important to report...

| Item                                                                                                                                             | Round 1 |          |         | Round 2 |          |         |
|--------------------------------------------------------------------------------------------------------------------------------------------------|---------|----------|---------|---------|----------|---------|
|                                                                                                                                                  | agree   | disagree | neutral | agree   | disagree | neutral |
| 1 the number of sessions (per day or week) with WBV?                                                                                             | 100     | 0        | 0       | 100     | 0        | 0       |
| 2 the number of exposures to WBV within one session?                                                                                             | 100     | 0        | 0       | 100     | 0        | 0       |
| 3 the time between sessions of WBV?                                                                                                              |         |          |         |         |          |         |
| 4 the on vs. off-times of vibration (e.g., pauses and how long) within one session?                                                              | 100     | 0        | 0       | 100     | 0        | 0       |
| 5 the total exposure time to WBV across all sessions?                                                                                            | 75      | 0        | 25      | 75      | 0        | 25      |
| 6 the conditions of the test room (e.g., light and temperature)?                                                                                 | 50      | 50       | 0       | 100     | 0        | 0       |
| 7 the location of the intervention (e.g., a separated experimental room or the room where the subjects are housed during the experiment)?        | 50      | 25       | 25      | 75      | 0        | 25      |
| 8 whether (motor) behavior is being monitored and/or reduced during the WBV session?                                                             | 75      | 25       | 0       | 100     | 0        | 0       |
| 9 which posture or body position the subjects take on during the vibration (e.g., sitting, standing, lying, etc.) depending on the species used? | 100     | 0        | 0       | 100     | 0        | 0       |
| 10 whether the position/posture changes during WBV?                                                                                              | 100     | 0        | 0       | 100     | 0        | 0       |
| 11 whether subjects were restrained or not during WBV?                                                                                           | 100     | 0        | 0       | 100     | 0        | 0       |
| 12 the time of day the WBV session takes place (in relation to the L/D cycle)?                                                                   | 50      | 50       | 0       | 100     | 0        | 0       |
| 13 the subjects' body weight before and after the entire WBV protocol?                                                                           | 75      | 0        | 25      | 100     | 0        | 0       |
| 14 whether the subjects were habituated to the device before the start of the WBV protocol?                                                      | 75      | 0        | 25      | 75      | 0        | 25      |
| 15 species-specific inclusion/exclusion criteria?                                                                                                | 100     | 0        | 0       | 100     | 0        | 0       |
| 16 whether whiskers were present/intact (when species are used having whiskers)?                                                                 | 0       | 50       | 50      | 75      | 0        | 25      |
| 17 whether the animals were anesthetized or not during the WBV session?                                                                          | 100     | 0        | 0       | 100     | 0        | 0       |
| 18 whether the animals were housed individually or in groups                                                                                     | 100     | 0        | 0       | 100     | 0        | 0       |

|                 |                                                                                                                                                      |     |   |   |
|-----------------|------------------------------------------------------------------------------------------------------------------------------------------------------|-----|---|---|
|                 | during a WBV session on the vibrating plate?                                                                                                         |     |   |   |
| 19 <sup>a</sup> | to what conditions EXACTLY the normal control animals/cell cultures were subjected to, in comparison to vibrated experimental animals/cell cultures? | 100 | 0 | 0 |

---

<sup>a</sup>Added on round 2 based on the suggestions of the respondents in round 1.
